# Supplementary material
Source: PubMed Central journal article supplement (PMC3393516)
Supplement: supp_194.14.3618_figS1-S3.pdf [file supp_194.14.3618_figS1-S3.pdf]

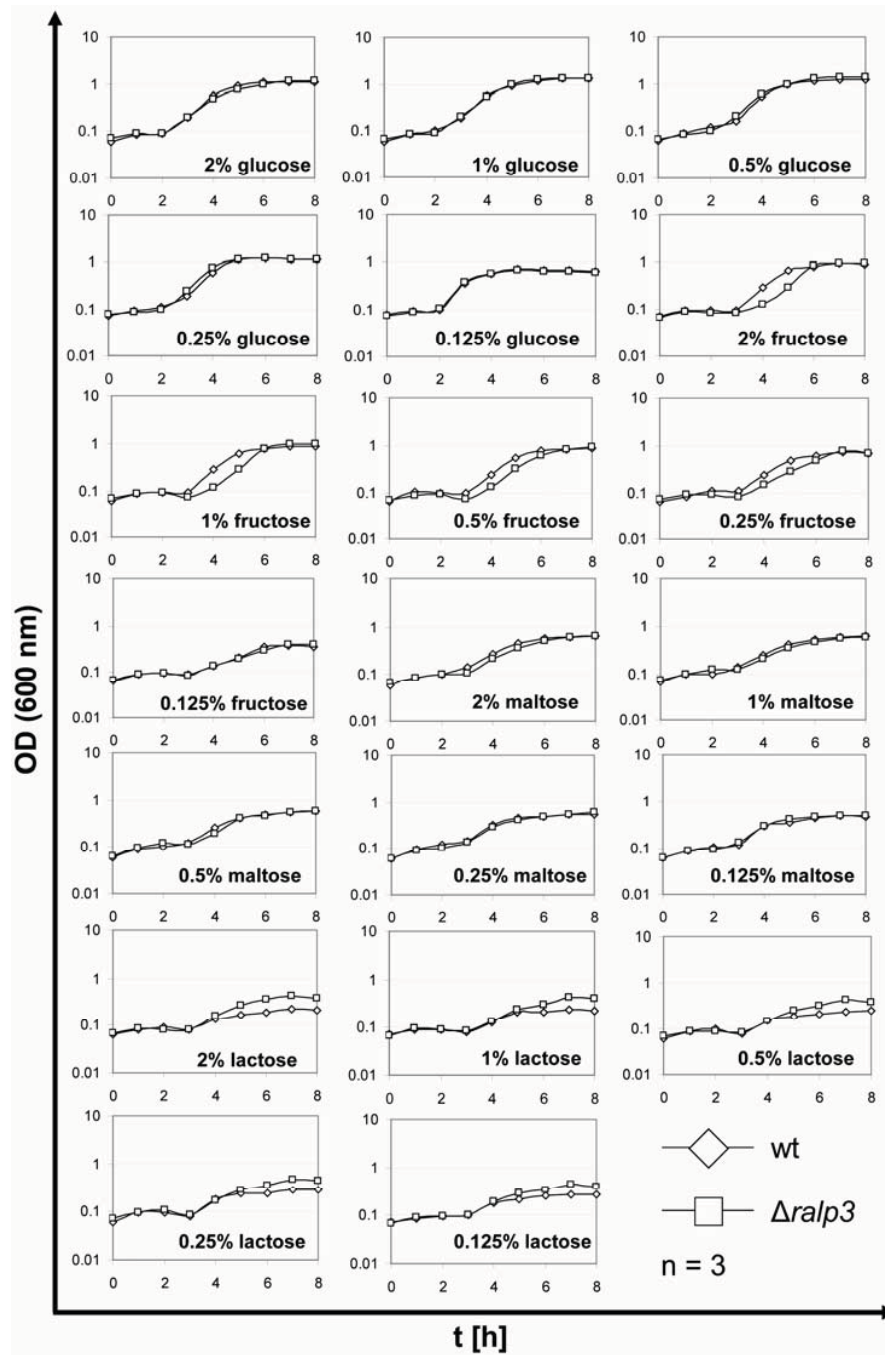

**Figure S1.** Growth of wild type and  $\Delta ralp3$  mutant strains in CDM supplemented with different carbon sources in varied amounts.

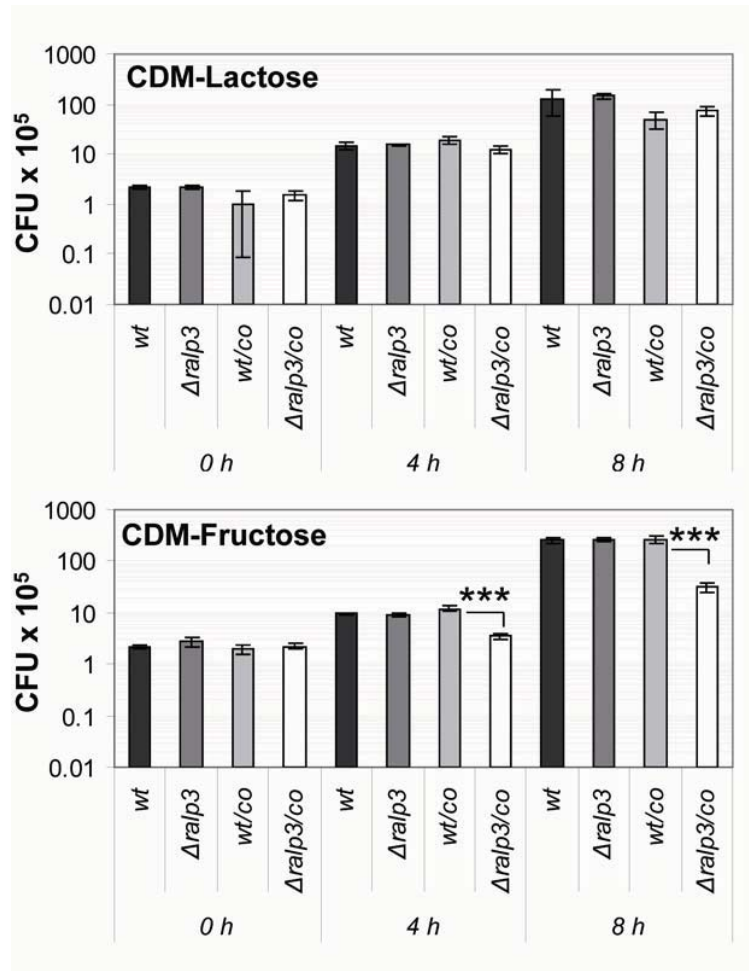

**Figure S2.** Determination of the CFU during the growth on CDM-Lactose and CDM-Fructose. wt: wild type control;  $\Delta$ ralp3:  $\Delta$ ralp3 deletion mutant control; wt/co and  $\Delta$ ralp3/co: both strains in a direct competition. (n = 3; \*\*\*  $p < 0.001$ ).

| Gene        | Fold change $\Delta ralp3$ (22) | Fold change $\Delta ralp3$ (this study) |
|-------------|---------------------------------|-----------------------------------------|
| <i>speB</i> | ↑                               | ↓                                       |
| <i>emm</i>  | ↑                               | ↓                                       |
| <i>mga</i>  | ↑                               | ↓                                       |
| <i>ska</i>  | ●                               | ●                                       |
| <i>eno</i>  | ↓                               | ●                                       |
| <i>epf</i>  | ↑                               | ●                                       |
| <i>sagA</i> | ●                               | ●                                       |
| <i>cpa</i>  | ●                               | ●                                       |

  

| Phenotype                 | (22) | This study |
|---------------------------|------|------------|
| Hyaluronic acid           | ↑    | ↓          |
| Blood survival            | ↑    | ↓          |
| SpeB activity             | ↑    | ↓          |
| Adherence/Internalization | ↑    | ↓          |

 down regulated/decreased  
 up regulated/increased  
 unaffected

**Figure S3.** Comparison of the gene regulation and phenotype between GAS M1T1 (19) and GAS M49 from this study.
